# Supplementary material
Source: Springer Nature journal article supplement (https://www.springermedizin.de/resource/supplementary/12889_2012_5613_MOESM4_ESM.pdf/9495264)
Supplement: MOESM4 [file 9495264]

# Who

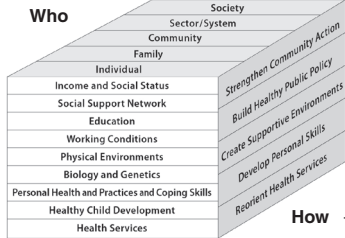

## What

## How

Income and social status

- More affordable daycare
- Free/financial assistance for education, should be covered for children
- Children should be allowed to start school at 3 yrs; daycare 0-3yrs, then school so less need for daycare
- Help should be available to immigrant women for free or a flat fee
- More affordable housing to lessen welfare needs
- More job access for immigrants
- Service where you can have access to jobs not just training on how to look for a job

Build healthy public policy

Create supportive environments

Social support network

- Service that allows families to visit from abroad, including simpler visa process for visiting family
- Translators are needed everywhere, welfare should contribute
- Employment centre that does not only critique your resume, but could conduct interviews themselves and then place you somewhere based on your skills
- Would like help to direct you in right career path for opportunities in Canada
- Newcomers need more help, especially with children
- Reorganization and centralization of points of services and resources with less paperwork
- Simplify immigration process i.e., paperwork
- Should not be penalized for sponsoring spouse/children, because the family unit is stronger than being alone
- Comprehensive booklets, in various languages, containing information on services and procedures for newcomers because there is a lack of knowledge about available resources
- Program to welcome new immigrants

Build healthy public policy

Create supportive environments

Education

- Additional irregular hours for those attending night classes or French class
- Create more classes for publicly funded education - reduce waiting lists

Build healthy public policy

Create supportive environments

Personal health and coping skills

- Ongoing assessment of integration into the country and support tailored to evolving needs
- Wants government to help people to help themselves
- Easier registration process at daycare
- Government should support parents in finding daycares

Strengthen community action

Build healthy public policy

Create supportive environments

Healthy child development

- More room in the daycares already existent or new daycares to be opened to meet demand
- Longer hours for daycare
- Create drop-in daycares or activity centres for children while parents attend to other activities e.g., going to a gym, filling in paperwork etc.
- Have 'on call' aides which would help reduce daycare waiting lists and allow parents to run quick errands

Create supportive environments

Build healthy public policy

Health services

- Create a walk-in clinic for specific immigrant women
- More money for more doctors
- Dental should be covered
- Better information provided about/from health care, there is a need for interpreters
- More clinics for pregnant women
- Not enough first responders
- Staff at hospitals need to be more friendly and empathetic
- Shorter wait times in emergency departments
- More staff would reduce wait times

Build healthy public policy

Create supportive environments

Reorient health services
